# Supplementary material for: Common signatures of differential microRNA expression in Parkinson’s and Alzheimer’s disease brains
Source: bioRxiv or medRxiv preprint supplement (doi:10.1101/2022.01.31.478486), 2022-01-31
Supplement: Supplementary file [file media-1.pdf]

**Table S1.** Overview of the PD case-control *post-mortem* brain samples analyzed in this study

|                                                | PD cases         | PD controls      |
|------------------------------------------------|------------------|------------------|
| <b>Total number</b>                            | 214              | 47               |
| <b>Sex</b>                                     |                  |                  |
| Number of males (%)                            | 144 (67.3%)      | 26 (55.3%)       |
| p-value <sup>a</sup>                           | 0.145            |                  |
| <b>Age at death (years)</b>                    |                  |                  |
| average (±SD)                                  | 78.8 (6.7)       | 81.1 (9.7)       |
| median (IQR)                                   | 79 (75-84)       | 83 (75.5-89)     |
| range                                          | 57-93            | 58-96            |
| p-value <sup>b</sup>                           | 0.137            |                  |
| <b>Age at onset (years)<sup>c</sup></b>        |                  |                  |
| average (±SD)                                  | 65.6 (10.2)      | n.a.             |
| median (IQR)                                   | 67 (59-72)       | n.a.             |
| range                                          | 30-88            | n.a.             |
| <b>Disease duration (years)<sup>c</sup></b>    |                  |                  |
| average (±SD)                                  | 13.0 (7.3)       | n.a.             |
| median (IQR)                                   | 11 (8-17)        | n.a.             |
| range                                          | 1-44             | n.a.             |
| <b>PMI (hours)</b>                             |                  |                  |
| average (±SD)                                  | 19.4 (9.5)       | 21.1 (9.7)       |
| median (IQR)                                   | 19 (12-24)       | 21 (13.5-24.75)  |
| range                                          | 2-48             | 5-48             |
| p-value <sup>b</sup>                           | 0.302            |                  |
| <b>RIN value</b>                               |                  |                  |
| average (±SD)                                  | 3.7 (1.4)        | 3.6 (1.4)        |
| median (IQR)                                   | 3.05 (2.5-4.68)  | 2.8 (2.4-4.8)    |
| range                                          | 2.2-7.5          | 2.3-7.6          |
| p-value <sup>b, d</sup>                        | 0.629            |                  |
| <b>RNA A260/280</b>                            |                  |                  |
| average (±SD)                                  | 1.94 (0.03)      | 1.95 (0.05)      |
| median (IQR)                                   | 1.94 (1.92-1.95) | 1.94 (1.93-1.96) |
| range                                          | 1.87-2.06        | 1.89-2.20        |
| p-value <sup>b</sup>                           | 0.130            |                  |
| <b>Alpha-synuclein Braak stage<sup>e</sup></b> |                  |                  |
| Stage 3                                        | 15 (7.0%)        | n.a.             |
| Stage 4                                        | 21 (9.8%)        | n.a.             |
| Stage 5                                        | 46 (21.5%)       | n.a.             |
| Stage 6                                        | 120 (56.1%)      | n.a.             |
| Data unavailable                               | 12 (5.6%)        | n.a.             |
| <b>Tau Braak stage<sup>f</sup></b>             |                  |                  |
| Stage 0                                        | 9 (4.2%)         | n.a.             |
| Stage 1                                        | 35 (16.5%)       | n.a.             |
| Stage 2                                        | 146 (68.2%)      | n.a.             |
| Stage 3                                        | 20 (9.3%)        | n.a.             |
| Stage 5                                        | 2 (0.9%)         | n.a.             |
| Data unavailable                               | 2 (0.9%)         | n.a.             |

**Legend.** *Post-mortem* brain samples from the supratemporal gyrus of Parkinson's (PD) patients and corresponding controls were provided by the Parkinson's UK Brain Bank at Imperial College London. SD = standard deviation; IQR = interquartile range; PMI = *post-mortem* interval; RIN = RNA integrity number; <sup>a</sup> = Pearson's Chi-squared test with Yates' continuity correction; <sup>b</sup> = Welch's two-sample

t-test; <sup>c</sup> = data available for 155 individuals; <sup>d</sup> = due to some deviation from normality, we also performed Wilcoxon rank sum test, but results did not change substantially, thus only the results of Welch's two-sample t-test are provided here; <sup>e</sup> = data available for 202 individuals; <sup>f</sup> = data available for 212 individuals; n.a. = not applicable/not available.
